# Supplementary material for: Cross-cultural translation, adaptation, and validation of the Amharic version pain self-efficacy questionnaire in people with low back pain in Ethiopia
Source: Springer Nature journal article supplement (doi:10.1186/s12891-021-03985-4), 2021-01-25
Supplement: MOESM1 [file 18798712]

**ፔይን ሰልፍ ኤፍክሲ መጠይቅ (Pain Self-efficacy questionnaire)**

እባክዎ ከዚህ በታች የተዘረዘሩትን ተግባራት ህመም ቢኖርም በምን ያህል በራስ መተማመን ማድረግ እንደሚችሉ ይግለጹ። መልስዎን በእያንዳንዱ ተግባራት ትይዩ በተቀመጡት መመዘኛዎች ላይ ያክቡ። መልስዎን ለመስጠት በቁጥር ከ ዜሮ እስከ ስድስት ካሉት ቁጥሮች ውስጥ አንዱን ብቻ በማክበብ ይግለጹ። ይህ ወይም ዜሮ ማለት በፍጹም በራስ መተማመን የላኝም ሲሆን ስድስት ማለት ደግሞ ሙሉ በሙሉ በራስ መተማመን አላኝ ማለት ነው።

ያስታውሱ፤ ከዚህ በታች የተዘረዘሩትን ነገሮች ከዚህ በፊት ማከናወን እንደሚችሉ እና እንደማይችሉ የሚጠይቅ ሳይሆን በአሁኑ ወቅት ምንም እንኳን ህመም ቢኖርም በምን ያህል የራስ መተማመን ማከናወን እንደሚችሉ ብቻ ነው።

|                                                                                                                         | በጭራሽ አልተማመንም |   |   |   |   |   | በጣም እተማመናለሁ |
|-------------------------------------------------------------------------------------------------------------------------|--------------|---|---|---|---|---|-------------|
|                                                                                                                         |              | 1 | 2 | 3 | 4 | 5 | 6           |
| 1. ህመም ቢኖርም እንኳን በነገሮች እደሰታለሁ                                                                                           | 0            | 1 | 2 | 3 | 4 | 5 | 6           |
| 2. ሕመም ቢኖርም እንኳን አብዛኛውን የቤት ውስጥ ስራዎችን መስራት እችላለሁ (ለምሳሌ ቤት ማፅዳት፣ ዕቃ ማጠብ ፣ አልጋ ማንጠፍ ፣ እቃ ማንሳት፣ ምግብ ማብሰል፣ እንጨት መፍለጥ፣ ወዘተ)። | 0            | 1 | 2 | 3 | 4 | 5 | 6           |
| 3. ሕመም ቢኖርብኝም እንኳን ሁልጊዜ እንደማደርገው ከጓደኞቼ ወይም ከቤተሰቤ ጋር ማህበራዊ ግኑኝነት ማድረግ እችላለሁ።                                             | 0            | 1 | 2 | 3 | 4 | 5 | 6           |
| 4. በ ብዙ ሁኔታዎች ህመሜን መቋቋም እችላለሁ                                                                                           | 0            | 1 | 2 | 3 | 4 | 5 | 6           |
| 5. ህመም ቢኖርም አንዳንድ ስራዎችን መስራት እችላለሁ (“ስራዎቹ” የቤት ውስጥ ፣ ክፍያ ያለው እና የሌለውም ሊሆን ይችላል)።                                        | 0            | 1 | 2 | 3 | 4 | 5 | 6           |
| 6. ህመም ቢኖርብኝም እንኳን ለመዝናናት ወይም በትርፍ ጊዜ የማከናወናቸው በርካታ ተግባራት አሁንም አደርጋቸዋለሁ።                                                | 0            | 1 | 2 | 3 | 4 | 5 | 6           |
| 7. መድሃኒት ሣልወሰድ ህመሜን መቋቋም እችላለሁ።                                                                                         | 0            | 1 | 2 | 3 | 4 | 5 | 6           |

|                                                  |   |   |   |   |   |   |   |
|--------------------------------------------------|---|---|---|---|---|---|---|
| 8. ህመም ቢኖርም እንኳን አብዛኛዎቹን የህይወት አላማዬን ማሳካት እችላለሁ። | 0 | 1 | 2 | 3 | 4 | 5 | 6 |
| 9. ህም ቢኖርም እንኳን መደበኛ ህይወቴን መምራት እችላለሁ።           | 0 | 1 | 2 | 3 | 4 | 5 | 6 |
| 10. ህመም ቢኖርም እንኳን ቀስ በቀስ የበለጠ በአካል ንቁ መሆን እችላለሁ። | 0 | 1 | 2 | 3 | 4 | 5 | 6 |
